# Supplementary material
Source: PubMed Central journal article supplement (PMC7902290)
Supplement: NIHMS1615856-supplement-1.pdf [file NIHMS1615856-supplement-1.pdf]

**Supplementary Table 1 (S1): Confidence in treatment of obesity**

|                                                                                                                                       | Obesity training hours (Quartiles) |                 |                 |                 | Overall<br>N=73 |
|---------------------------------------------------------------------------------------------------------------------------------------|------------------------------------|-----------------|-----------------|-----------------|-----------------|
|                                                                                                                                       | 1st                                | 2 <sup>nd</sup> | 3 <sup>rd</sup> | 4 <sup>th</sup> |                 |
|                                                                                                                                       | N=22                               | N=18            | N=16            | N=17            |                 |
| <b>I am generally successful in treating obesity in children, adolescents, and young adults with obesity (n, %)</b>                   |                                    |                 |                 |                 |                 |
| Strongly disagree/ Disagree                                                                                                           | 20 (90.9)                          | 13 (72.2)       | 14 (87.5)       | 9 (52.9)        | 56 (76.7)       |
| Neutral                                                                                                                               | 1 (4.6)                            | 3 (16.7)        | 2 (12.5)        | 7 (41.2)        | 13 (17.8)       |
| Strongly agree/ Agree                                                                                                                 | 1 (4.6)                            | 2 (11.1)        | 0               | 1 (5.9)         | 4 (5.5)         |
| <b>I feel I am well trained to provide nutrition counseling to children, adolescent, and young adult patients with obesity (n, %)</b> |                                    |                 |                 |                 |                 |
| Not Confident                                                                                                                         | 13 (59.1)                          | 10 (55.6)       | 8 (50.0)        | 5 (29.4)        | 36 (49.3)       |
| Confident                                                                                                                             | 9 (40.9)                           | 8 (44.4)        | 8 (50.0)        | 12 (70.6)       | 37 (50.7)       |
| <b>I feel I am well trained to provide exercise counseling to children, adolescents, and young adult patients with obesity (n, %)</b> |                                    |                 |                 |                 |                 |
| Not Confident                                                                                                                         | 11 (50.0)                          | 8 (44.4)        | 6 (37.5)        | 4 (23.5)        | 29 (39.7)       |
| Confident                                                                                                                             | 11 (50.0)                          | 10 (55.6)       | 10 (62.5)       | 13 (76.5)       | 44 (60.3)       |
| <b>I feel confident to provide motivational interviewing to children, adolescent, and young adult patients with obesity (n, %)</b>    |                                    |                 |                 |                 |                 |
| Not Confident                                                                                                                         | 15 (68.2)                          | 12 (66.7)       | 10 (62.5)       | 9 (52.9)        | 46 (63.0)       |
| Confident                                                                                                                             | 7 (31.8)                           | 6(33.3)         | 6 (37.5)        | 8 (47.1)        | 27 (37.0)       |
| <b>I feel confident about utilization of weight loss medications as a treatment of obesity (n, %)</b>                                 |                                    |                 |                 |                 |                 |
| Not Confident                                                                                                                         | 16 (72.7)                          | 16 (88.9)       | 15 (93.8)       | 16 (94.1)       | 63 (86.3)       |
| Confident                                                                                                                             | 6 (27.3)                           | 2 (11.1)        | 1 (6.3)         | 1(5.9)          | 10 (13.7)       |
| <b>I feel confident when discussing potential eligibility for bariatric surgery with pediatric patients (n, %)</b>                    |                                    |                 |                 |                 |                 |
| Not Confident                                                                                                                         | 20 (90.9)                          | 17 (94.4)       | 12 (75.0)       | 15 (88.2)       | 64 (87.7)       |
| Confident                                                                                                                             | 2 (9.1)                            | 1 (5.6)         | 4 (25.0)        | 2 (11.8)        | 9 (12.3)        |
| <b>I feel confident about providing patient care before bariatric surgery (n, %)</b>                                                  |                                    |                 |                 |                 |                 |
| Not Confident                                                                                                                         | 17 (94.4)                          | 17 (94.4)       | 13 (81.3)       | 13 (76.5)       | 60 (82.2)       |
| Confident                                                                                                                             | 5 (22.7)                           | 1 (5.6)         | 3 (18.8)        | 4 (23.5)        | 13 (17.8)       |
| <b>I feel confident about providing patient care after bariatric surgery (n, %)</b>                                                   |                                    |                 |                 |                 |                 |
| Not Confident                                                                                                                         | 17 (77.3)                          | 16 (88.9)       | 12 (75.0)       | 13 (76.5)       | 58 (79.5)       |
| Confident                                                                                                                             | 5 (22.7)                           | 2 (11.1)        | 4 (23.5)        | 4 (23.5)        | 15 (20.6)       |

Supplementary Table 2 (S2): Provider Perceptions Regarding Contributors to Obesity - Multivariable Ordered Logistic Regression

| Contributor                          | Restaurant/ Fast Food eating |              | Consumption of Sugar-sweetened beverages |             | Physical inactivity |         | Poor nutritional habits |         | Repeated dieting (weight cycling) |             | Psychological problems |         |
|--------------------------------------|------------------------------|--------------|------------------------------------------|-------------|---------------------|---------|-------------------------|---------|-----------------------------------|-------------|------------------------|---------|
|                                      | OR (95% CI)                  | P value      | OR (95% CI)                              | P value     | OR (95% CI)         | P value | OR (95% CI)             | P value | OR (95% CI)                       | P value     | OR (95% CI)            | P value |
| <b>Training hours (quartile)</b>     |                              |              |                                          |             |                     |         |                         |         |                                   |             |                        |         |
| 1st                                  | ref                          | ---          | ref                                      | ---         | ref                 | ---     | ref                     | ---     | ref                               | ---         | ref                    | ---     |
| 2nd                                  | 1.13 (0.2 – 6.5)             | >0.1         | 4.41 (0.7 – 28.9)                        | >0.1        | 0.18 (0.0 – 2.0)    | >0.1    | ---                     | ---     | 2.51 (0.6 – 10.2)                 | >0.1        | 2.93 (0.8 – 11.4)      | >0.1    |
| 3rd                                  | 0.73 (0.1 – 4.2)             | >0.1         | 2.88 (0.5 – 17.9)                        | >0.1        | 0.28 (0.0 – 3.4)    | >0.1    | 0.44 (0.1 – 2.7)        | >0.1    | 2.15 (0.5 – 9.4)                  | >0.1        | 1.71 (0.4 – 6.8)       | >0.1    |
| 4th                                  | 0.62 (0.1 – 3.6)             | >0.1         | 3.93 (0.5 – 28.5)                        | >0.1        | 0.38 (0.0 – 5.5)    | >0.1    | 1.07 (0.2 – 7.4)        | >0.1    | 2.14 (0.4 – 10.3)                 | >0.1        | 2.26 (0.5 – 9.4)       | >0.1    |
| <b>BMI class</b>                     |                              |              |                                          |             |                     |         |                         |         |                                   |             |                        |         |
| Normal                               | ref                          | ---          | ref                                      | ---         | ref                 | ---     | ref                     | ---     | ref                               | ---         | ref                    | ---     |
| Overweight                           | 0.13 (0.0 – 1.7)             | >0.1         | 0.13 (0.0 – 1.1)                         | 0.06        | 0.11 (0.0 – 1.1)    | 0.06    | 0.29 (0.0 – 2.8)        | >0.1    | 1.37 (0.2 – 7.5)                  | >0.1        | 2.52 (0.5 – 12.3)      | >0.1    |
| Obesity                              | 0.02 (0.0 – 0.4)             | <b>0.009</b> | 0.15 (0.0 – 1.7)                         | >0.1        | 0.09 (0.0 – 1.4)    | 0.08    | 0.12 (0.0 – 2.1)        | >0.1    | 1.49 (0.2 – 9.0)                  | >0.1        | 1.08 (0.2 – 5.7)       | >0.1    |
| <b>Overweight/Obesity previously</b> | 17.85 (1.2 – 265.6)          | <b>0.04</b>  | 10.36 (1.2 – 92.5)                       | <b>0.04</b> | 4.38 (0.5 – 40.0)   | >0.1    | 3.83 (0.3 – 42.6)       | >0.1    | 0.79 (0.2 – 3.8)                  | >0.1        | 1.06 (0.2 – 4.5)       | >0.1    |
| <b>Specialty</b>                     |                              |              |                                          |             |                     |         |                         |         |                                   |             |                        |         |
| Internal Medicine/Pediatrics         | ref                          | ---          | ref                                      | ---         | ref                 | ---     | ref                     | ---     | ref                               | ---         | ref                    | ---     |
| Pediatrics                           | 4.55 (1.2 – 17.3)            | <b>0.03</b>  | 1.14 (0.3 – 4.7)                         | >0.1        | 0.92 (0.2 – 5.2)    | >0.1    | 0.14 (0.0 – 1.4)        | 0.09    | 0.28 (0.1 – 0.9)                  | <b>0.03</b> | 1.02 (0.3 – 3.1)       | >0.1    |

OR indicates odds ratio derived from ordered (aka ordinal) logistic regression model, which assumes proportional odds between each level of the dependent variable.

**Supplementary Table 2 (S2): Provider Perceptions Regarding Contributors to Obesity - Multivariable Ordered Logistic Regression, cont'd**

| Contributor                          | Lack of willpower |             | Genetic factors    |             | Metabolic defect/<br>Endocrine disorder |         | Medications (e.g.<br>prednisone, insulin) |         | Osteoarthritis or other<br>mobility problems |             |
|--------------------------------------|-------------------|-------------|--------------------|-------------|-----------------------------------------|---------|-------------------------------------------|---------|----------------------------------------------|-------------|
|                                      | OR (95% CI)       | P value     | OR (95% CI)        | P value     | OR (95% CI)                             | P value | OR (95% CI)                               | P value | OR (95% CI)                                  | P value     |
| <b>Training hours (quartile)</b>     |                   |             |                    |             |                                         |         |                                           |         |                                              |             |
| 1st                                  | ref               | ---         | ref                | ---         | ref                                     | ---     | ref                                       | ---     | ref                                          | ---         |
| 2nd                                  | 0.61 (0.2 – 2.1)  | >0.1        | 2.77 (0.6 – 13.6)  | >0.1        | 0.41 (0.1 – 2.5)                        | >0.1    | 0.81 (0.2 – 3.3)                          | >0.1    | 1.09 (0.3 – 4.4)                             | >0.1        |
| 3rd                                  | 0.47 (0.1 – 2.0)  | >0.1        | 2.31 (0.4 – 12.0)  | >0.1        | 0.22 (0.0 – 1.8)                        | >0.1    | 0.67 (0.1 – 3.0)                          | >0.1    | 0.51 (0.1 – 2.3)                             | >0.1        |
| 4th                                  | 0.87 (0.2 – 3.4)  | >0.1        | 0.47 (0.1 – 2.1)   | >0.1        | 1.47 (0.3 – 7.9)                        | >0.1    | 0.78 (0.2 – 3.7)                          | >0.1    | 0.84 (0.2 – 3.7)                             | >0.1        |
| <b>BMI class</b>                     |                   |             |                    |             |                                         |         |                                           |         |                                              |             |
| Normal                               | ref               | ---         | ref                | ---         | ref                                     | ---     | ref                                       | ---     | ref                                          | ---         |
| Overweight                           | 1.94 (0.4 – 8.8)  | >0.1        | 10.47 (1.2 – 88.2) | <b>0.03</b> | 2.21 (0.3 – 15.8)                       | >0.1    | 0.87 (0.2 – 4.6)                          | >0.1    | 3.40 (0.7 – 16.3)                            | >0.1        |
| Obesity                              | 2.57 (0.5 – 12.3) | >0.1        | 2.38 (0.4 – 16.0)  | >0.1        | 0.67 (0.1 – 6.4)                        | >0.1    | 0.95 (0.2 – 5.5)                          | >0.1    | 1.04 (0.2 – 5.6)                             | >0.1        |
| <b>Overweight/Obesity previously</b> | 0.69 (0.2 – 2.8)  | >0.1        | 0.47 (0.1 – 2.7)   | >0.1        | 0.92 (0.1 – 6.1)                        | >0.1    | 0.72 (0.2 – 3.3)                          | >0.1    | 0.41 (0.1 – 1.7)                             | >0.1        |
| <b>Specialty</b>                     |                   |             |                    |             |                                         |         |                                           |         |                                              |             |
| Internal Medicine/Pediatrics         | ref               | ---         | ref                | ---         | ref                                     | ---     | ref                                       | ---     | ref                                          | ---         |
| Pediatrics                           | 3.88 (1.3 – 11.9) | <b>0.02</b> | 0.67 (0.2 – 2.5)   | >0.1        | 0.51 (0.1 – 2.1)                        | >0.1    | 0.36 (0.1 – 1.2)                          | 0.09    | 0.24 (0.1 – 0.8)                             | <b>0.02</b> |

OR indicates odds ratio derived from ordered (aka ordinal) logistic regression model, which assumes proportional odds between each level of the dependent variable.

Supplementary Table 3 (S3): Personal habits of providers

|                                                                                                                                                 | Obesity training hours (Quartiles) |                 |           |           | Overall<br>N=73 |
|-------------------------------------------------------------------------------------------------------------------------------------------------|------------------------------------|-----------------|-----------|-----------|-----------------|
|                                                                                                                                                 | 1st                                | 2 <sup>nd</sup> | 3rd       | 4th       |                 |
|                                                                                                                                                 | N=22                               | N=18            | N=16      | N=17      |                 |
| <b>Do you consider yourself to have good nutritional habits? (n, %)</b>                                                                         |                                    |                 |           |           |                 |
| Infrequently/almost never                                                                                                                       | 1 (4.6)                            | 1 (5.6)         | 0         | 0         | 2 (2.7)         |
| Neutral                                                                                                                                         | 3 (13.6)                           | 2 (11.1)        | 4 (25.0)  | 1 (5.9)   | 10 (13.7)       |
| Frequently/almost always                                                                                                                        | 18 (81.8)                          | 15 (83.3)       | 12 (75.0) | 16 (94.1) | 61 (83.6)       |
| <b>Do you perform regular physical activity of at least 150 minutes of moderate intensity or 75 minutes of vigorous activity weekly? (n, %)</b> |                                    |                 |           |           |                 |
| Infrequently/almost never                                                                                                                       | 3 (13.6)                           | 2 (11.1)        | 2 (12.5)  | 2 (11.8)  | 9 (12.3)        |
| Neutral                                                                                                                                         | 4 (18.2)                           | 3 (16.7)        | 3 (18.8)  | 3 (17.7)  | 13 (17.8)       |
| Frequently/almost always                                                                                                                        | 15 (68.2)                          | 13 (72.2)       | 11 (68.9) | 12 (70.6) | 52 (70.6)       |
| <b>Do you use techniques to reduce stress? e.g. yoga, meditation, prayer? (n, %)</b>                                                            |                                    |                 |           |           |                 |
| Infrequently/almost never                                                                                                                       | 13 (59.1)                          | 4 (22.2)        | 9 (56.3)  | 8 (47.1)  | 34 (46.6)       |
| Neutral                                                                                                                                         | 2 (9.1)                            | 9 (50.0)        | 5 (31.3)  | 3 (17.7)  | 19 (26.0)       |
| Frequently/almost always                                                                                                                        | 7 (31.8)                           | 5 (27.8)        | 2 (12.5)  | 6 (35.3)  | 20 (27.4)       |
| <b>Do you use smartphone applications to help you manage your weight? (n, %)</b>                                                                |                                    |                 |           |           |                 |
| Infrequently/almost never                                                                                                                       | 18 (81.8)                          | 14 (77.8)       | 11 (68.8) | 14 (82.4) | 57 (78.1)       |
| Neutral                                                                                                                                         | 1 (4.6)                            | 3 (16.7)        | 3 (18.8)  | 2 (11.8)  | 9 (12.3)        |
| Frequently/almost always                                                                                                                        | 3 (13.6)                           | 1 (5.6)         | 2 (12.5)  | 1 (5.9)   | 7 (9.6)         |
